# Supplementary material
Source: PubMed Central journal article supplement (PMC1794378)

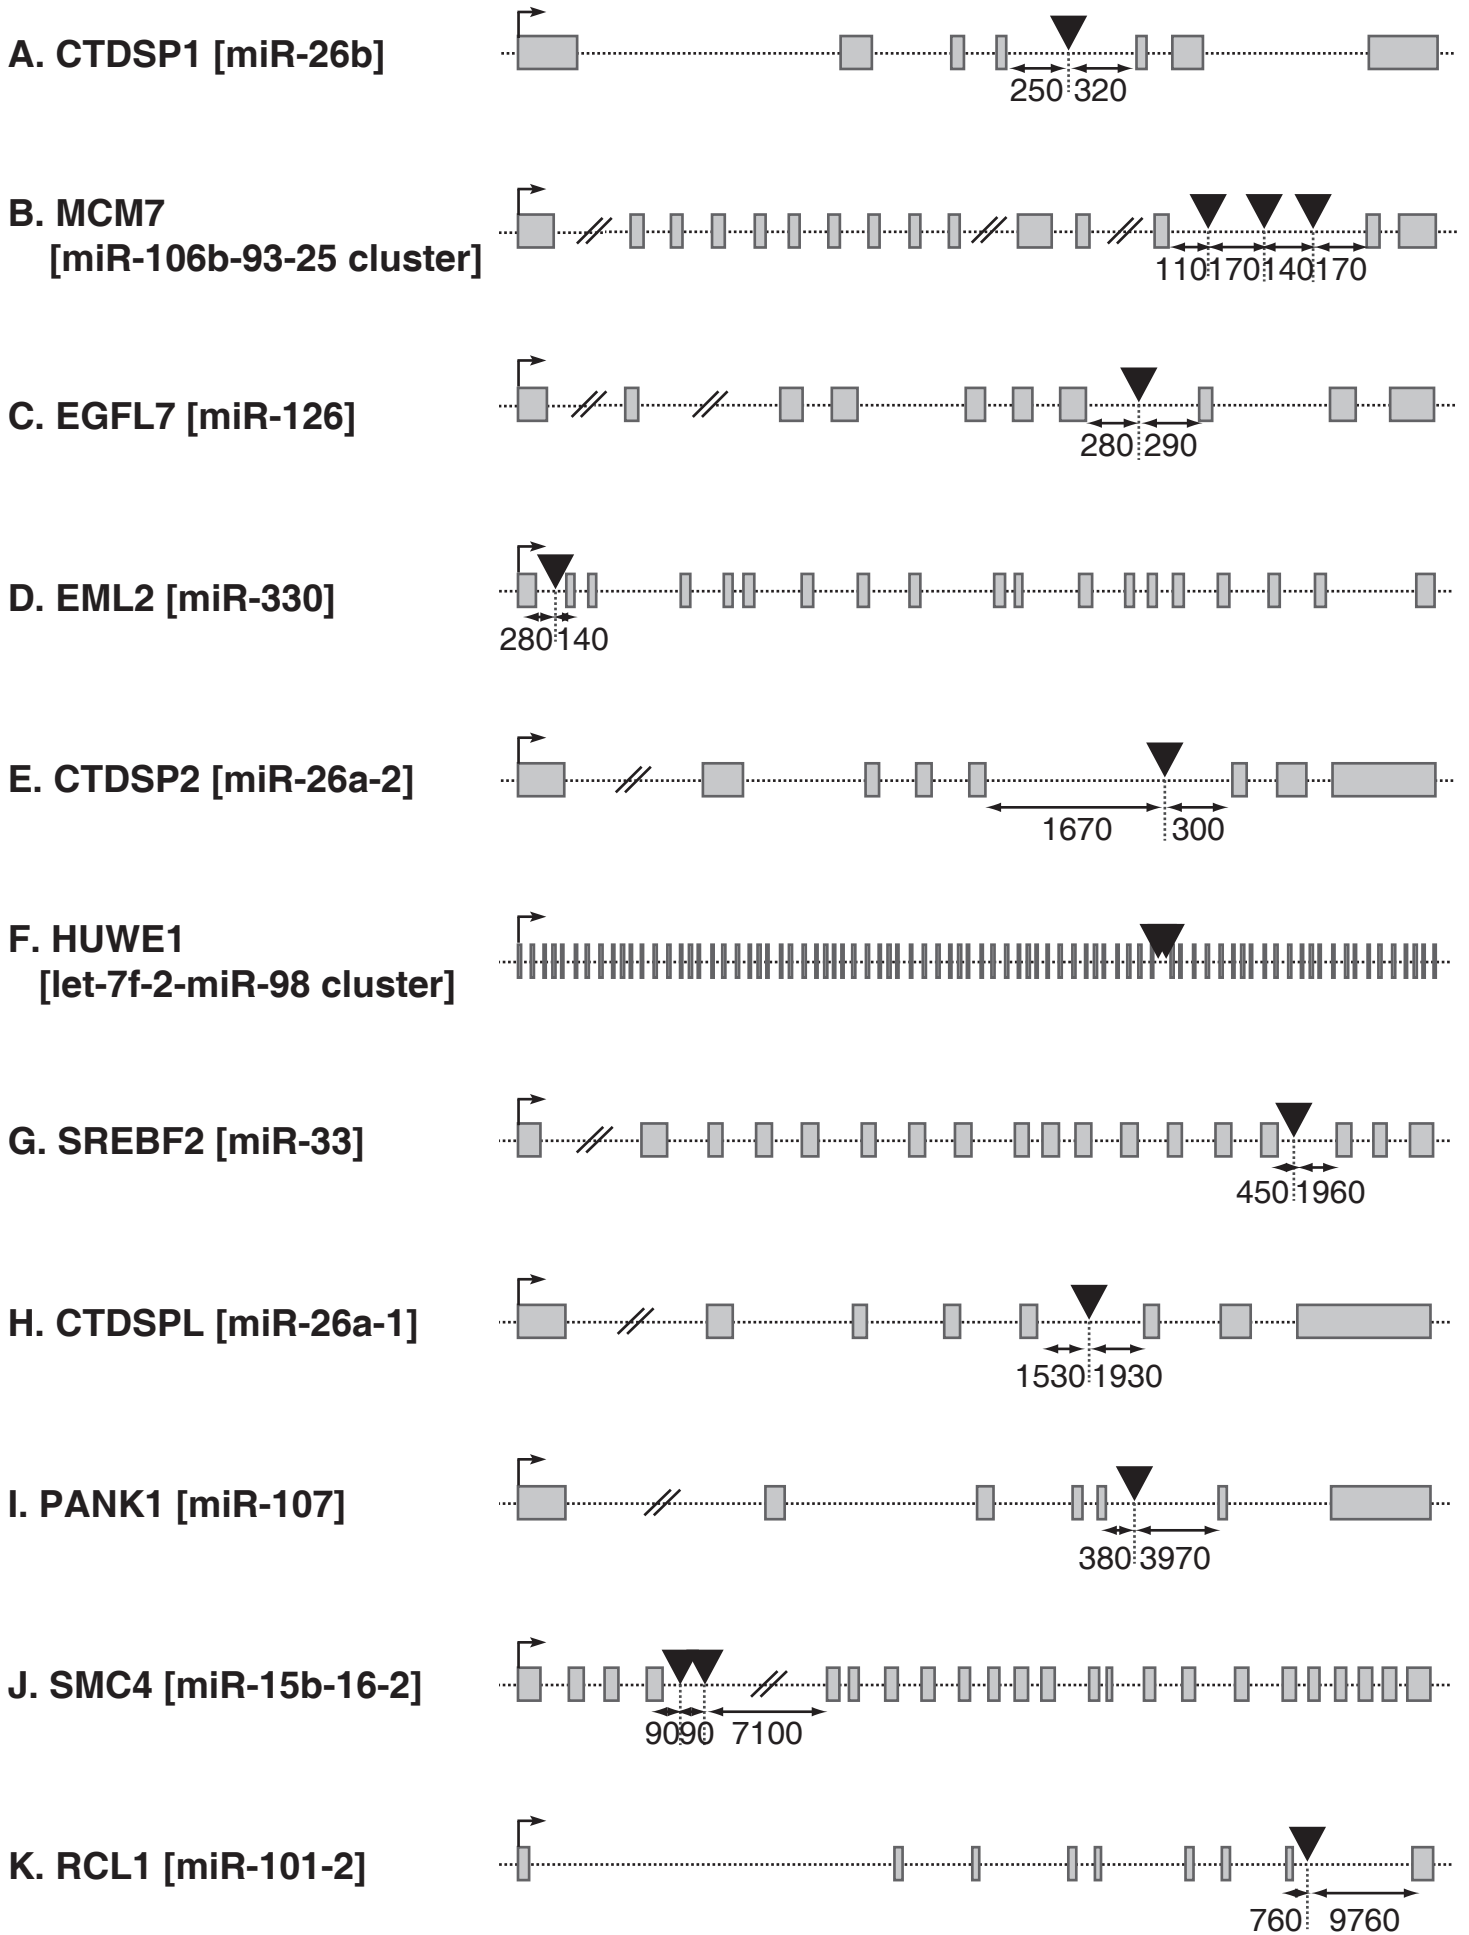

Supplement: 7601512s2.pdf [file 7601512s2.pdf]
