# Supplementary material
Source: PubMed Central journal article supplement (PMC1794378)
Supplement: 7601512s3.pdf [file 7601512s3.pdf]

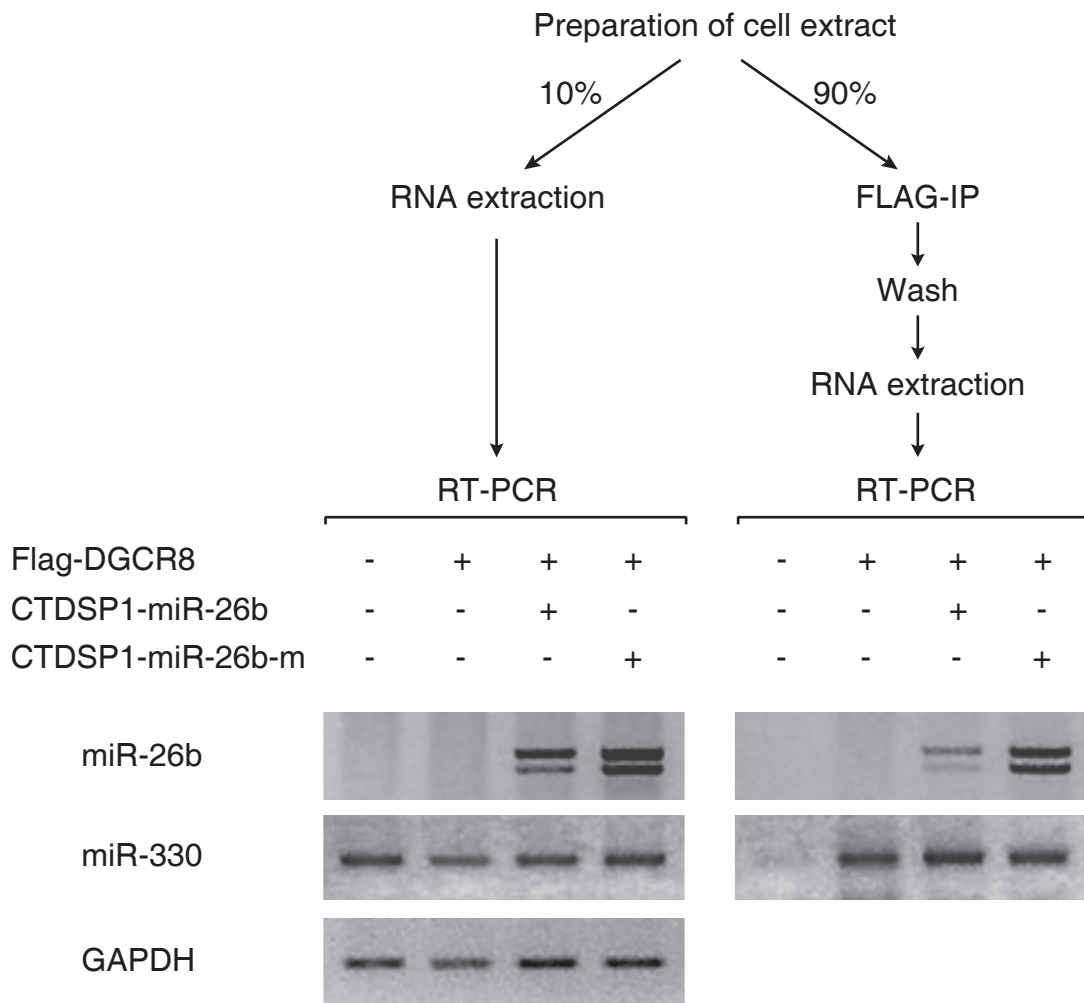

Kim, Supplementary figure 2
